# Supplementary material
Source: HighWire-hosted journal article supplement (https://bmjopenquality.bmj.com/highwire/filestream/136196/field_highwire_adjunct_files/0/ds2496.docx)
Supplement: ds2496.docx [file ds2496.docx]

**Figures and tables:**

Supplementary file. Fig 2: Complications by type and frequency


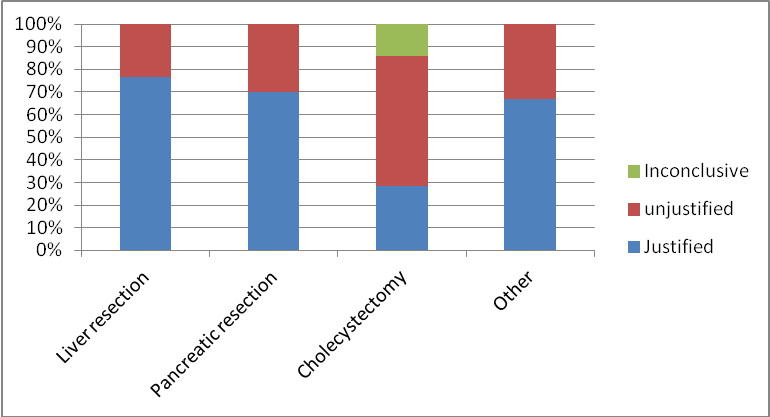


Supplementary file. Fig 3: Justification by procedure

**
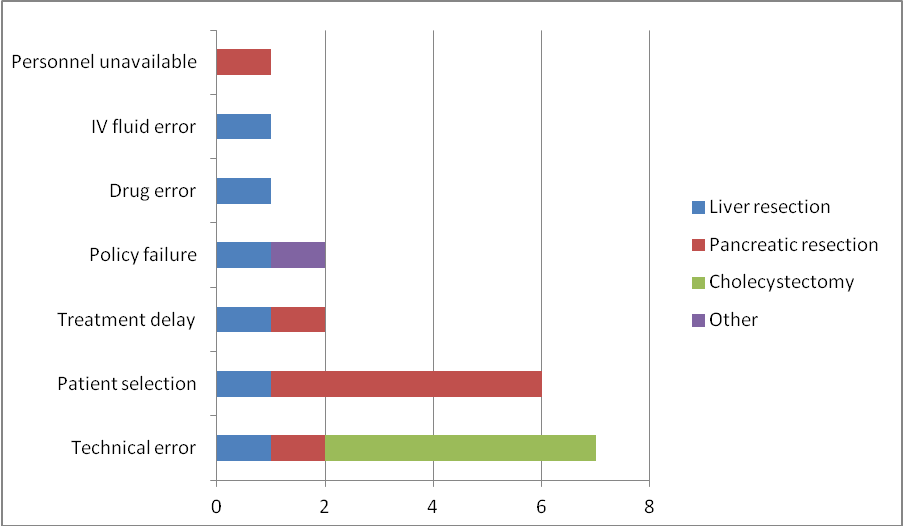
**

Supplementary file. Fig. 4: Errors identified for each procedure
